# Supplementary material for: Melanocortin 1 Receptor Deficiency Promotes Atherosclerosis in Apolipoprotein E−/− Mice
Source: PubMed Central journal article supplement — Arterioscler Thromb Vasc Biol. 2018 Jan 24;38(2):313–23. doi: 10.1161/ATVBAHA.117.310418 (PMC5779319; doi:10.1161/atvbaha.117.310418), 2018-01-24

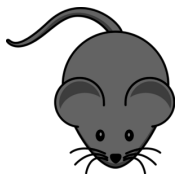

~~MC1-R~~

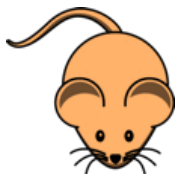

Global MC1-R deficiency  
on ApoE<sup>-/-</sup> background

**Liver**  
Bile acid synthesis ↓  
Cholesterol accumulation ↑

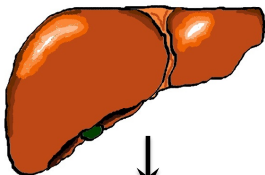

**Hypercholesterolemia ↑**

**Monocytes**  
PSGL-1 ↑ CD62L ↑

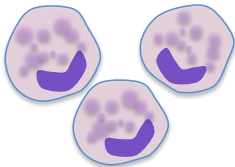

**Atherosclerotic plaques**  
Lesion size ↑  
Necrotic core ↑  
Collagen content ↓  
Monocytes & macrophages ↑

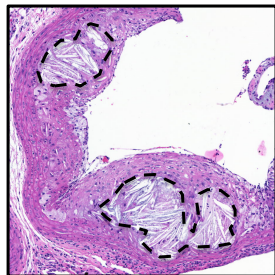

Supplement: atv-38-313-s001.pdf [file atv-38-313-s001.pdf]
